# Supplementary material for: Genome-wide analysis of respiratory burst oxidase homolog gene family in pea (Pisum sativum L.)
Source: Frontiers journal article supplement (doi:10.3389/fpls.2023.1321952), 2023-12-12
Supplement: Data_Sheet_1.ZIP [file Data_Sheet_1.ZIP]

## Sheet: Sheet1
Supplementary Table S2: Amino acid sequence of PsRBOHs.
ID	Amino acid sequence
PsRBOH1	MRTSSFRRCTTSKTELDFPEHSETSSPTAGKHVYGAMLPVFLNDLRSNHHKELVEITLELENDAVVLSNIAPISSAPNASPSSSHTVARGGDSFTGGGVARSLSISSRIKYKFPWLRSMSLRTSTSSSESVTAVEEDPMVARNARRMRAELERTRSSAQRGLKGLRFISKSGEACEELWKKVEKRFGFLAKDGFLDRENFGECIGMEDSKEFAVGIFDALARKERKAVSKITKEELRQFWLQISNQSFDARLQIFFDMADSNEDGRITREEVQELIMLSASANNLSKLKEQAEGYAALIMEELDPENLGYIELWQLEMLLLEKDRYMTYSRQQSSASVNWSQNMSSLRPKNKIHKIRKTLQCLALEYWRRGWILLLWLIAIASLFTWKIYQYKNRSSFE…
PsRBOH2	MEIQENHHPVHHETWSETESIGSRSTRSTRVGFSGSLSGPLSGPLVSNNKKKSSKKSARFSDDVEDFVEITLDVRDDTVSVQNIRGGDSETALLASRLEKRPSTLSVKLKQVSQELKRMTSSKKFDRVDRAKSGAARALKGLKFMTKTVGTDRGWSQVEKRFDELEVDGKLPKTRFSQCIGMNESKDFAGELFDALSRRRGITSASITKDELREFWEQITDQSFDSRLQTFFDMVDKNADGRISEHEVKEIITLSASANKLSKLQDRAEEYAALIMEELDPDNLGFIELHNLEMLLLQAPAQSTHMHTDSRVLSQMLSQKLVPTKEHNPIKRGFRSLNYFVEDNWKRIWIVALWMAICAALFTWKFIQYKNRAVFHVMGYCVTTAKGAAETLKFNMALI…
PsRBOH3	MSSENQGKDESSTWILESIDIVADHVEVSKKDENNGSMVTKASDNEAFLDNGSNGSNVRQRNNNNHNASKMVRVQSGAARGLKGLRFLDRTVTGKEGDAWKSIEKRFFQHAVGGMLFKDKFGQCMGMGADSKEFAGELYDALARRRNISVESGINLSQVKVFWEDMTSKDLESRLQVFFDMCDKNGDGRLSEDEVKEVIVLSASANRLGNLKDQASVYAALIMEELDPDHNGYIEMWQLETLLKEMVNAEDGTTRLSNRTETLTRAMIPCKYRTPIRKFVSKTTEFVYDKWKKIWIFVLWLAVNLILFIWKFLQYKEKPAYEVMGSCVCFAKGAAETLKFNMGLIVLTMCRRTLTMLRGSFLSQIIPFDDNIHFHIVIAIGVVIGTFIHVGVHVTCDFP…
PsRBOH4	MGADEVEGVSADNHNRDSDIELIGVHTERLPHNVSLNKRRTSKLKVSNSSSAIDLSHGKSQEQDEEKEEKEDYVEVTMDIQGDSVALHSVKTVTGSGNNDDGEDEKRVLLGKGMEKKRSFGASIVRTASIRMKHVSQELKRLTSFSNSKQVGHEKVYDRTKSAASHALVGLKFINKKTDGDDGVGWFEVEKQFEILTNSTSDGLLHRSLFAKCIGMNKESEAFAGELFDAMSRRRNIHGDSINKAQLKDFWDQISDQSFDSRLRTFFDMVDKDADGRITEEEIKQIICLSATTNKLSNIQKQAEEYAALIMEELDPDGTGFIMVNDLEILLLHGPTHSTRGDSKYLSQMLSIKLKATYEYNPVRKRYRDAIYFLQDNWQRTWILVLWIGVMCGLFAYKF…
PsRBOH5	METQENQHESWSEPETTTESRRSRVGFSGPLSGPLSGPLVTNKRRNGSKNKSASFKNEDGEMVEITLDVREDTVSVQNIRGGDSETAYLASRLERKPSSLSSRLKQVSQELKRMTSFKTFDKVDRSKSGAARALQGLKFVTKSVGSDVWSQVEKRFDELSVDGKLPQTRFGQCIGMHESKEFADELYEALVRRRGISTASITKEELREFWEQITDQSFDSRLQIFFDMVDKNADGRITEEEVKEIITLSASANKLSKLQDRAVEYAALIMEELDPDNLGYIELYNLEMLLLQAPAQSAHITTDSRVLSQMLSQKLVPTKEHNPIKRAFRELSYFMEDNWKRIWIIALWLSICAALFTWKFIQYKRRAVFHVMGYCVTTAKGGAETLKFNMALILLPVCR…
PsRBOH6	MNDIPKHERRWASDTVPGKVTVSAGTSPGTESSYASDEFVEVTIDLRDDDTIVLRSVEPAGVNVNVNIDDSVAGSGYDTPASVPRSPSIRRNSSRGFRHFSQELKAEAVAKAKQFSQELRRFSWSHGHASRTLSSSAGHTGTSSAGVGGFETALAARALRKQRAQLDRTRTGAHKALRSLKFISSKSNGLDAWNEVQKNFDKLAKDGFLHRVDFGQCIGMKDSKEFALELFDALGRKQRLKVDKINREELLEFWTQITNQSFDSRLQIFFDMVDKNEDGRITEEEVKEVIMLSASANKLSRLQEQAEEYAALIMEELDPERLGYIELWQLETLLLQKDTYLNYSQALSYTSQALSQNLQGLRMKSPIRRVSRRFIYYLQENWRRLWVLTLWVCIMIGLF…
PsRBOH7	MEGTSSADLHHHESDIELIAPENITKLSVAESKAGTYVDHNKEEEAADYVEVTMDIQGNSVALHSMKTITESDMGESDREKLCLTGKRLVKKKSFGASVVQNATIRIKQLKRLASFAKPEPAKRLERTKSAVAHALTGLKFISTTDVGAGWSKVEKEFEKLTAITDGYLPRALFAKCIGLNAESEAYAEKLFDTLARQRGIQGGLINKIQLREFWDCISDQSFDTRLKTFFDMVDKDADGRITEEEIKDIICLSATANKLSNIQKQAEEYAALIMEELDPDDTGYILIGNLETLLLHGPEENTRGESKYLSQMLSQKLTPIFEENPIKRWYRDTKYFFQDNWRRSWVFALWIGVMLGLFAYKFVQYRRRAAYEVMGHCVCMAKGAAETLKLNMAIILLP…
